# Supplementary material for: Bamboo leaf derived ultrafine Si nanoparticles and Si/C nanocomposites for high-performance Li-ion battery anodes
Source: Royal Society of Chemistry journal article supplement (doi:10.1039/c5nr02578h), 2015-01-01
Supplement: c5nr02578h1.pdf [file c5nr02578h1.pdf]

## Electronic Supplementary Information

### Bamboo Leaves Derived Ultrafine Si Nanoparticles and Si/C Nanocomposites for High-performance Li-ion Battery Anodes

Lei Wang <sup>a</sup>, Biao Gao <sup>b</sup>, Changjian Peng <sup>a</sup>, Xiang Peng <sup>c</sup>, Jijiang Fu <sup>b</sup>, Paul K Chu <sup>c</sup> and Kaifu Huo <sup>a\*</sup>

<sup>a</sup> *Wuhan National Laboratory for Optoelectronics(WNLO), Huazhong University of Science and Technology, Wuhan 430074, China.*

<sup>b</sup> *The State Key Lab for Refractory and Metallurgy, Wuhan University of Science and Technology, Wuhan 430081, China*

<sup>c</sup> *Department of Materials Science and Physics, City University of Hong Kong, Tat Chee Avenue, Kowloon, Hong Kong, China*

[\*] E-mail: [kfhuo@hust.edu.cn](mailto:kfhuo@hust.edu.cn)

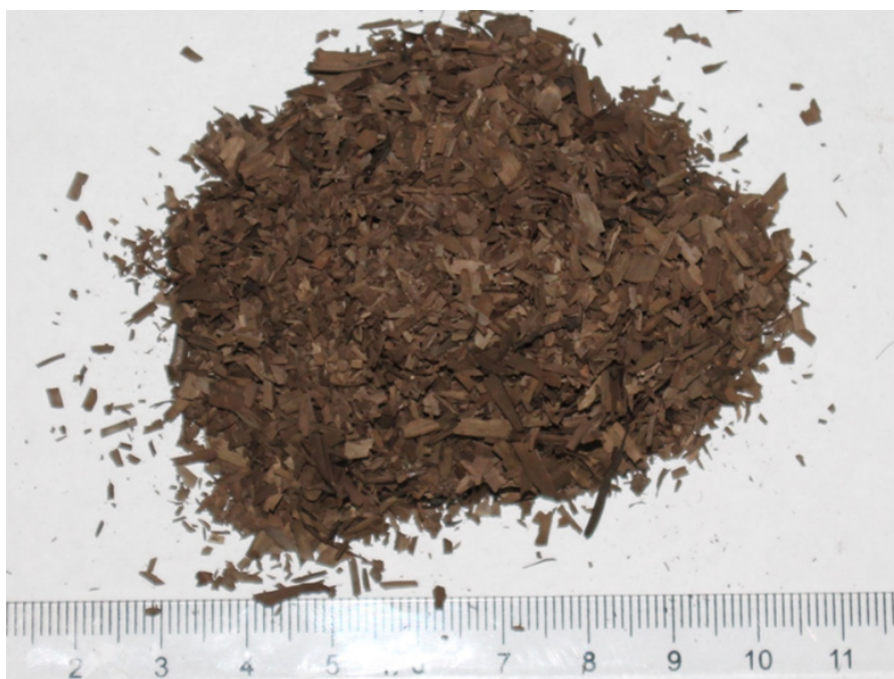

**Figure S1.** Optical photograph of HC-leached dead bamboo leaves (BLs).

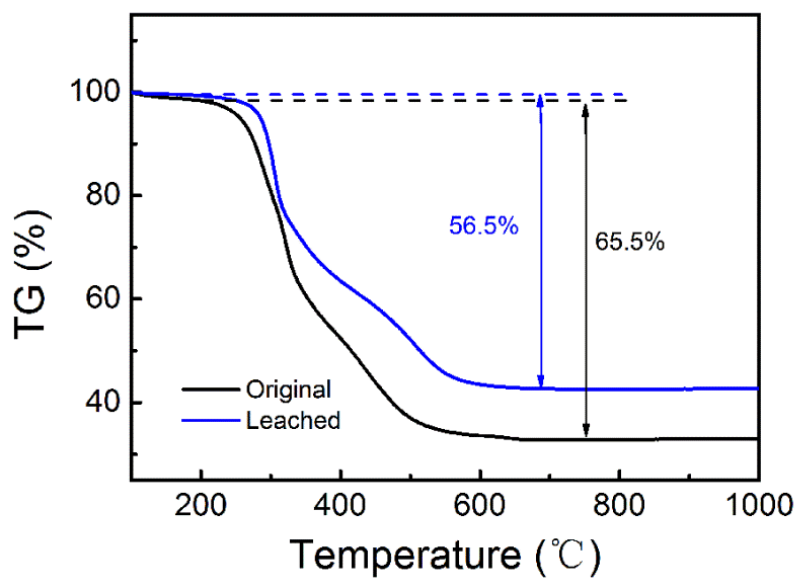

**Figure S2.** TG Curves for original BLs and HCl-leached BLs, suggesting the carbon weighs about 56.5% of HCl-leached BLs.

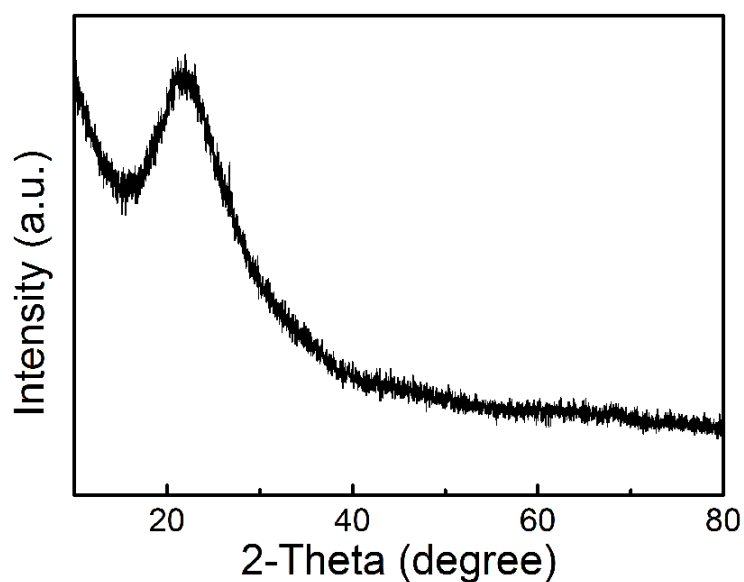

**Figure S3.** XRD pattern for SiO<sub>2</sub>. A broad peak at around 22.5° indicates the amorphous characteristic of silica derived from BLs

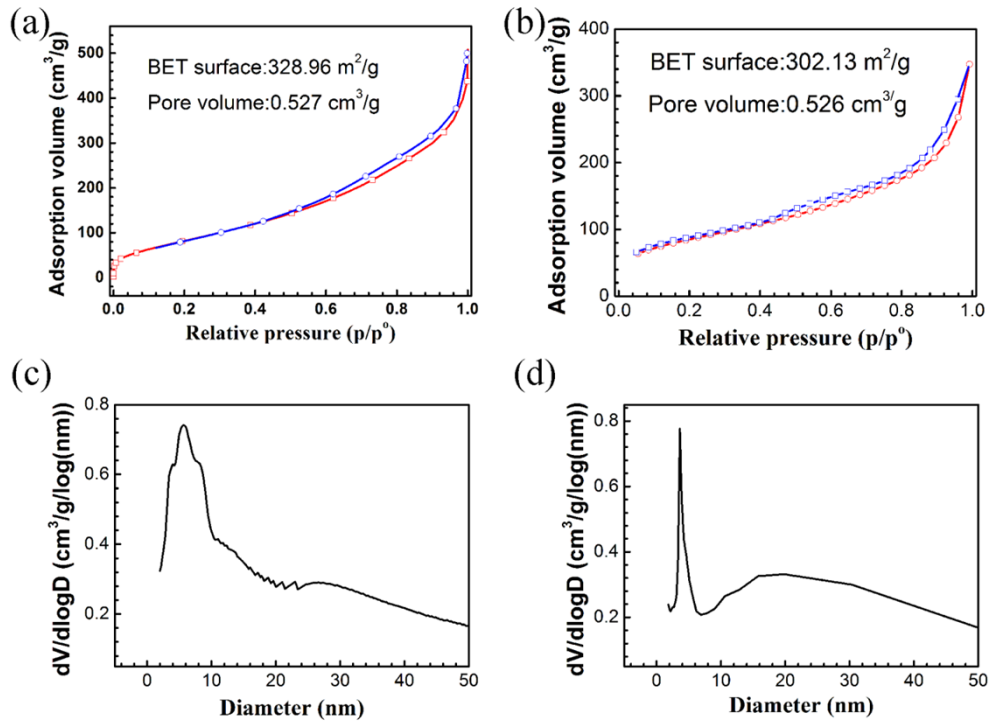

**Figure S4.** BET results for silica and silicon. (a-b) Isothermal of BLs derived SiO<sub>2</sub> and Si NPs. (c-d) pore distribution for BLs derived SiO<sub>2</sub> and Si NPs.

Assuming that the silicon NPs are absolute spherical particles with radius  $r$  and density  $\rho$ .

The mass :

$$m = \rho V = \rho \frac{4\pi r^3}{3}$$

The surface area :  $S = 4\pi r^2$

The surface area could be calculated:

$$S_{bet} = \frac{S}{m} = \frac{4\pi r^2}{\frac{4\pi r^3}{\rho \frac{3}{r}}} = \frac{3}{\rho r}$$

Since the density of crystalline silicon is 2.33 g cm<sup>-3</sup> and testing results showed the BET surface is 302 m<sup>2</sup>/g, thus, the radius is calculated:

$$r = \frac{3}{\rho S_{bet}} = 4.2 \text{ (nm)}$$

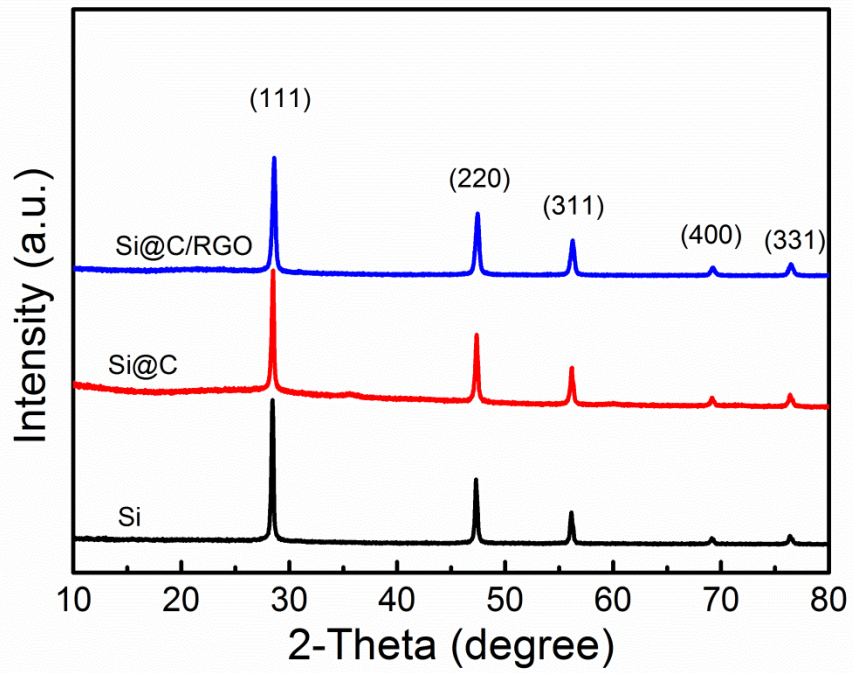

**Figure S5.** XRD patterns for Si, Si@C and Si@C/RGO, suggesting that the Si in Si@C and Si@C/RGO composite remain crystalline structure.

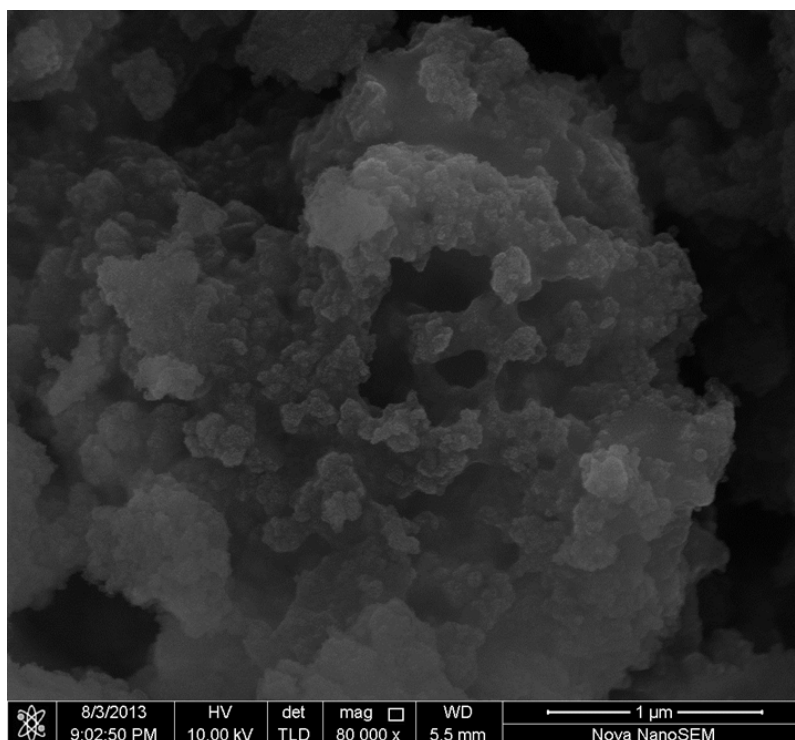

**Figure S6.** BLs derived Si produced by magnesiothermic reduction of BLs derived SiO<sub>2</sub> without adding NaCl as the heat-scavenger. Only large Si particles sintered together with a size of ten micrometers are prepared due to the large heat release from the highly exothermic reaction. The high local temperature (over 1720 °C) can collapse the architecture of the nanosized SiO<sub>2</sub> precursor and fuse and agglomerate the as-synthesized Si into large crystals, resulting in the formation of bulk Si.

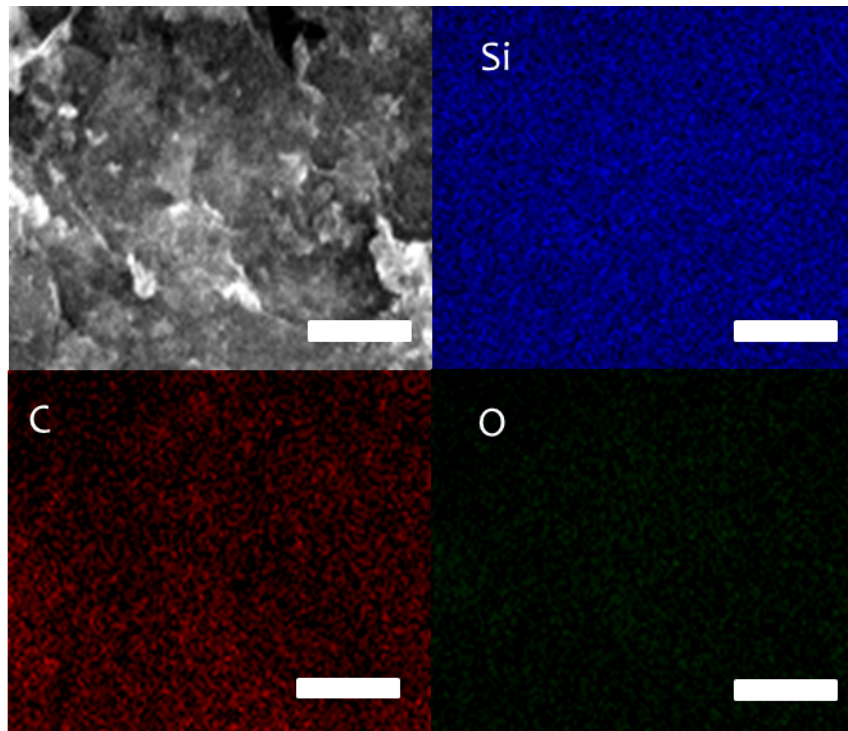

**Figure S7.** EDS Mapping for the sample of Si@C/RGO nanocomposites. The scale bar is 30  $\mu\text{m}$ . The C and Si are well dispersed in the whole image, indicating the Si were well dispersed in Si@C/RGO nanocomposites

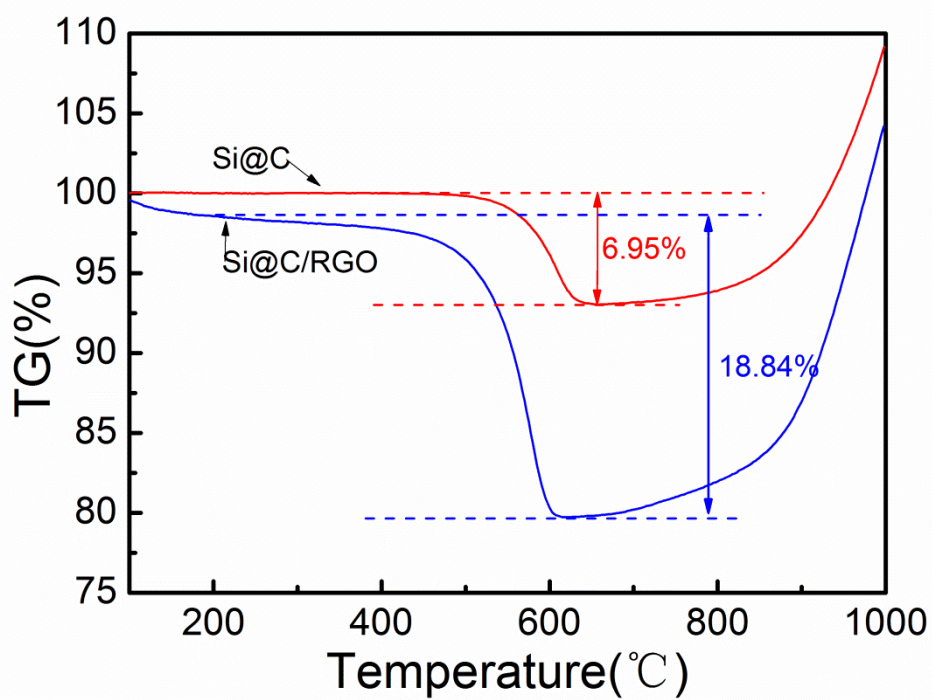

**Figure S8.** TG curves for Si@C and Si@C/RGO, indicate that the C coating and RGO contribute about 6.9% and 11.9%, respectively, and so the weight of Si in Si@C/RGO nanocomposites is 82.2%

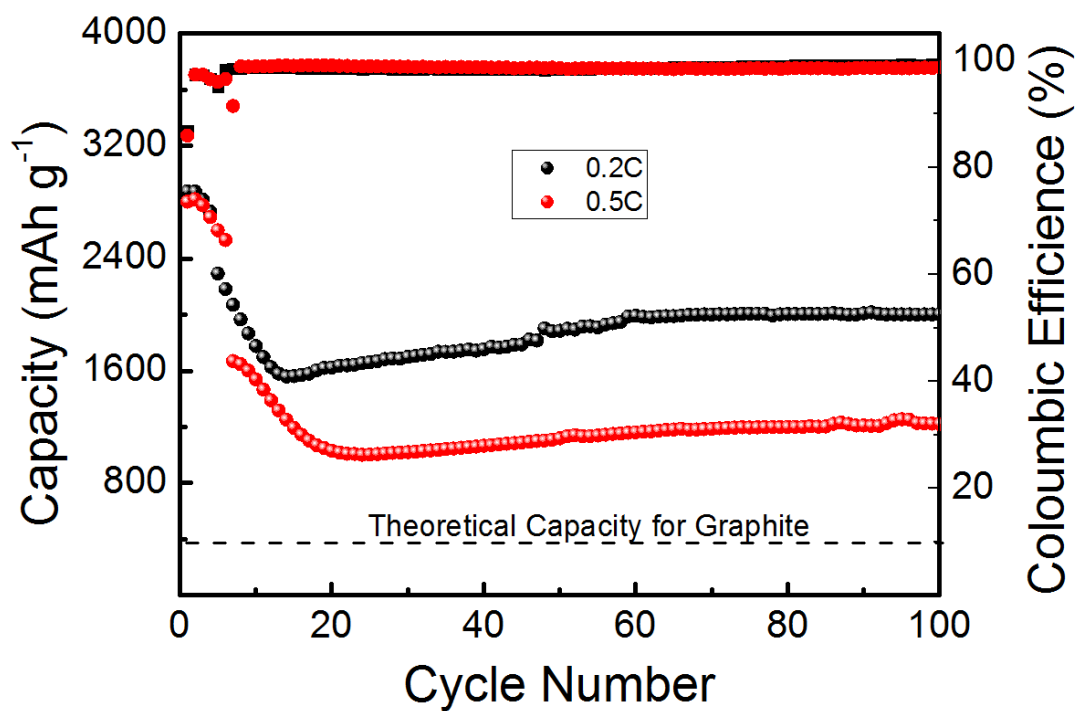

**Figure S9.** Discharging capacity curves of the Si NPs versus cycle number at 0.2C and 0.5C rates. The BLs-derived Si NPs exhibit good cycle stability and high specific capacity of 1,800 and 1,200 mAh/g at 0.2 C and 0.5 C rates after 100 cycles, which are 4.8 and 3.2 times larger than the theoretical capacity of graphite.



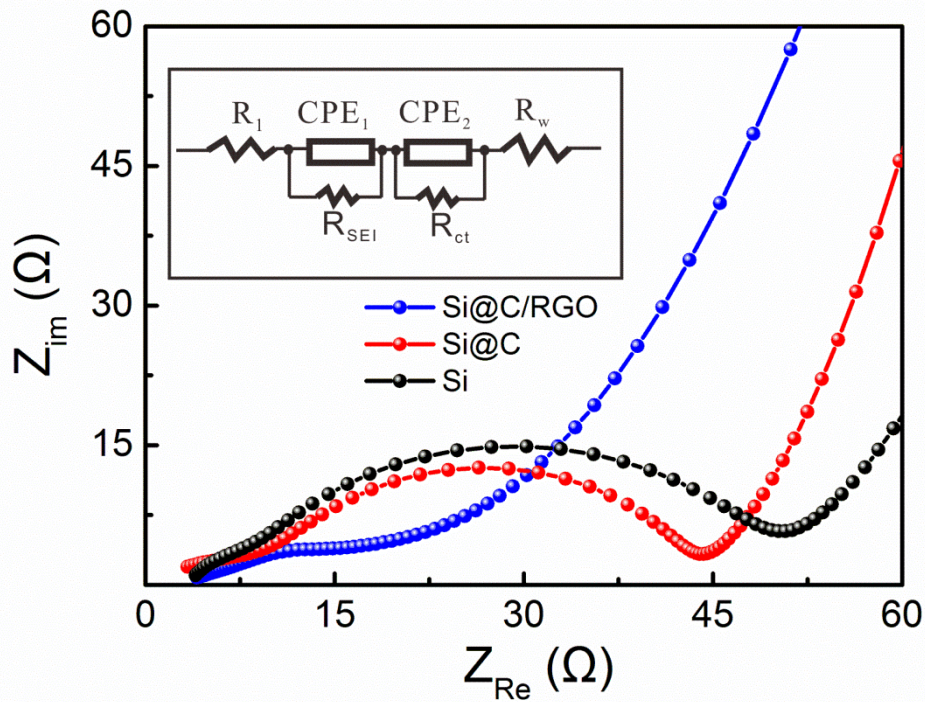

**Figure S10.** The Nyquist plots the equivalent circuit for the Si, Si@C and Si@C/RGO electrodes.

In the equivalent circuit,  $R_1$  is composed of electrolyte resistance ( $R_s$ ) and electrode resistance ( $R_e$ );  $R_{SEI}$  represents the SEI resistance;  $R_{ct}$  represents the charge-transfer resistance across the electrode-electrolyte interface;  $CPE_1$  is the constant-phase element which represents the diffusion capacitance attributed to Li-ion diffusion in SEI film and  $CPE_2$  is the electric double-layer capacitance of electrode-solution interface. The Warburg element represents impedance due to diffusion of ions into the active material of the electrode

The Capacity contributed by the Carbonaceous Components:

The capacity contributions from carbonized PDA, Carbon Black and RGO were calculated on the following procedure:

Capacity contribution of carbon black in Si@C electrode(%):

Weight content of carbon black  $\times$  Capacity of carbon black / Capacity of Si@C electrode =  $0.2 \times 170 / 1850 \times 100\% = 1.8\%$

Capacity contribution of carbonized PDA in Si@C electrode(%):

Weight content of carbonized PDA  $\times$  Capacity of carbonized PDA / (Capacity of Si@C electrode - Weight content of carbon black  $\times$  Capacity of carbon black) =  $0.069 \times 196 / (1850 - 0.018 \times 170) \times 100\% = 0.7\%$

Capacity contribution of RGO in Si@C/RGO electrode(%):

Weight content of RGO  $\times$  Capacity of RGO / (Capacity of Si@C/RGO electrode - Weight content of carbon black  $\times$  Capacity of carbon black) =  $0.119 \times 524 / (1900 - 0.018 \times 170) \times 100\% = 3.28\%$

Capacity contribution of carbonized PDA in Si@C/RGO electrode(%):

Weight content of carbonized PDA  $\times$  Capacity of carbonized PDA / (Capacity of Si@C/RGO electrode - Weight content of carbon black  $\times$  Capacity of carbon black) =  $0.069 \times 196 / (1900 - 0.018 \times 170) \times 100\% = 0.7\%$

\*The capacity of carbon black and carbonized PDA is based on *Proc. Natl. Acad. Sci. U. S. A.*, 2013, **110**, 12229-12234

\*The capacity of RGO is based on *Electrochem. Commun.*, 2011, **13**, 1332-1335.
